# Supplementary material for: Newly identified climatically and environmentally significant high latitude dust sources
Source: Copernicus journal article supplement (doi:10.5194/acp-2021-963), 2021-12-17
Supplement: Supplementary file 1 [file acp-2021-963-supplement-version2.pdf]

# 1 **Supplementary Material**

## 2 **Newly identified climatically and environmentally significant high-** 3 **latitude dust sources**

4 Outi Meinander<sup>1</sup>, Pavla Dagsson-Waldhauserová<sup>2,3</sup>, Pavel Amosov<sup>4</sup>, Elena Aseyeva<sup>5</sup>, Cliff Atkins<sup>6</sup>,  
5 Alexander Baklanov<sup>7</sup>, Clarissa Baldo<sup>8</sup>, Sarah Barr<sup>9</sup>, Barbara Barzycka<sup>10</sup>, Liane G. Benning<sup>11,23</sup>, Bojan  
6 Cvetkovic<sup>12</sup>, Polina Enchilik<sup>5</sup>, Denis Frolov<sup>5</sup>, Santiago Gassó<sup>13</sup>, Konrad Kandler<sup>14</sup>, Nikolay Kasimov<sup>5</sup>,  
7 Jan Kavan<sup>15</sup>, James King<sup>16</sup>, Tatyana Koroleva<sup>5</sup>, Viktoria Krupskaya<sup>5,6</sup>, Markku Kulmala<sup>18</sup>, Monika  
8 Kusiak<sup>19</sup>, Hanna K Lappalainen<sup>18</sup>, Michał Łaska<sup>11</sup>, Jerome Lasne<sup>20</sup>, Marek Lewandowski<sup>19</sup>, Bartłomiej  
9 Luks<sup>19</sup>, James B McQuaid<sup>10</sup>, Beatrice Moroni<sup>21</sup>, Benjamin J Murray<sup>10</sup>, Ottmar Möhler<sup>22</sup>, Adam Nawrot<sup>19</sup>,  
10 Slobodan Nickovic<sup>13</sup>, Norman T. O'Neill<sup>23</sup>, Goran Pejanovic<sup>13</sup>, Olga B. Popovicheva<sup>5</sup>, Keyvan  
11 Ranjbar<sup>23,a</sup>, Manolis N. Romanias<sup>20</sup>, Olga Samonova<sup>5</sup>, Alberto Sanchez-Marroquin<sup>10</sup>, Kerstin  
12 Schepanski<sup>24</sup>, Ivan Semenov<sup>5</sup>, Anna Sharapova<sup>11</sup>, Elena Shevnina<sup>1</sup>, Zongbo Shi<sup>9</sup>, Mikhail Sofiev<sup>1</sup>,  
13 Frédéric Thevenet<sup>20</sup>, Throstur Thorsteinsson<sup>25</sup>, Mikhail A. Timofeev<sup>5</sup>, Nsikanabasi Silas Umo<sup>22</sup>, Andreas  
14 Uppstu<sup>1</sup>, Darya Urupina<sup>20</sup>, György Varga<sup>26</sup>, Tomasz Werner<sup>19</sup>, Olafur Arnalds<sup>2</sup>, and Ana Vukovic  
15 Vimic<sup>27</sup>

16

17 <sup>1</sup>Finnish Meteorological Institute, Helsinki, 00101, Finland

18 <sup>2</sup>Agricultural University of Iceland, Reykjavik, 112, Iceland

19 <sup>3</sup>Czech University of Life Sciences Prague, Prague, 16521, Czech Republic

20 <sup>4</sup>INEP Kola Science Center RAS, Apatity, Russia

21 <sup>5</sup>Lomonosov Moscow State University, Moscow, 119991, Russia

22 <sup>6</sup>Institute of Geology of Ore Deposits, Petrography, Moscow, 119017, Russia

23 <sup>7</sup>Te Herenga Waka—Victoria University of Wellington, Wellington, 6012, New Zealand

24 <sup>8</sup>World Meteorological Organization, WMO, Geneva, 1211, Switzerland

25 <sup>9</sup>University of Birmingham, Birmingham, B15 2TT, United Kingdom

26 <sup>10</sup>University of Leeds, Leeds, LS2 9JT, United Kingdom

27 <sup>11</sup>University of Silesia in Katowice, Sosnowiec, 41-200, Poland

28 <sup>12</sup>German Research Centre for Geosciences, Helmholtz Centre Potsdam, 14473, Germany

29 <sup>13</sup>Republic Hydrometeorological Service of Serbia, 11030, Belgrade, Serbia

30 <sup>14</sup>University of Maryland, College Park MD, 20742, United States of America

31 <sup>15</sup>Technical University of Darmstadt, Darmstadt, 64287, Germany

32 <sup>16</sup>Masaryk University, Brno, 61137, Czech Republic

33 <sup>17</sup>University of Montreal, Montreal, H3T 1J4, Canada

34 <sup>18</sup>Institute for Atmospheric and Earth System Research, University of Helsinki, Helsinki, 00101, Finland

35 <sup>19</sup>Institute of Geophysics, Polish Academy of Sciences, Warsaw, 01-452, Poland

36 <sup>20</sup>IMT Lille Douai, SAGE, Université de Lille, 59000 Lille, France

37 <sup>21</sup>University of Perugia, Perugia, 06123, Italy

38 <sup>22</sup>Institute of Meteorology and Climate Research, Karlsruhe Institute of Technology, Karlsruhe, 76227, Germany.

39 <sup>23</sup>Université de Sherbrooke, Sherbrooke, J1K, Canada

40 <sup>24</sup>Free University of Berlin, Berlin, 12165, Germany

41 <sup>25</sup>University of Iceland, Reykjavik, 102, Iceland

42 <sup>26</sup>Research Centre for Astronomy and Earth Sciences, Budapest, 1112, Hungary

43 <sup>27</sup>University of Belgrade, Faculty of Agriculture, Belgrade, 11080, Serbia

44 <sup>a</sup>now at: Flight Research Laboratory, National Research Council Canada, Ottawa, ON, Canada

45

46

47

#### 48 **Supplementary Animation**

49 [http://www.seevccc.rs/HLDpaper/NMMB\\_DREAM\\_circumpolar\\_dustload\\_animation.gif](http://www.seevccc.rs/HLDpaper/NMMB_DREAM_circumpolar_dustload_animation.gif)

#### 50 **Supplementary Tables and Figures**

51

52 **Table S1. The contemporary category of the newly identified high-latitude dust sources included in this study based on the**  
53 **currently available observations. The number refers to the source number of the map in Figure 1. Also, McMurdo Dry Valley is**  
54 **estimated to best fit Category 3 and the McMurdo Ice Shelf ‘debris bands’ to Category 2.**

55

| Cat | HLD No.                    | Description                  | Climatic or environmental significance | Criteria                                                            |
|-----|----------------------------|------------------------------|----------------------------------------|---------------------------------------------------------------------|
| 1   | 30, 31, 32, 34             | Active source                | High                                   | Frequently active dust source with >10 dust events documented       |
| 2   | 25, 26, 27, 35             | Moderately active source     | Moderate                               | 5–10 dust events documented or a smaller potential source area      |
| 3   | 1, 2-24, 28-29, 33, 36 –64 | Source with unknown activity | Small/Currently unknown                | Infrequent activity or a new source with 1–5 dust events documented |

56

57 **Table S2. Iceland dust sources and observations on dust events identified in this study based on satellite images of 2002–2011,**  
58 **source numbers 23–35 in Figure 1.**

59

| Location in Iceland | Satellite observations |
|---------------------|------------------------|
|---------------------|------------------------|

|                               |                                         |
|-------------------------------|-----------------------------------------|
| No. 23 Reykjanes              | 2 events, 2004 and 2011                 |
| No. 24 Eyrabakki              | 3 events, 2002–2011                     |
| No. 25 Hagavatnssvæði         | 8 events, 2002–2011                     |
| No. 26 Fljótshlíð             | 8 events, 2002–2011                     |
| No. 27 Langisjór              | 5 events in 2010; 3 events in 2002–2011 |
| No. 28 Eldhraun/Landbrot      | 3 events 2002–2011                      |
| No. 29 Eldhraun               | 3 events 2002–2011                      |
| No. 30 Klausturfjara          | 17 events 2002–2011                     |
| No. 31 Núpsvötn               | 39 events 2002–2011                     |
| No. 32 Holuhraun              | 29 events 2002–2011                     |
| No. 33 Vikurhraun/Vikursandur | 2 events 2002–2011                      |
| No. 34 Höfn í Hornarfirði     | 13 events 2002–2011                     |
| No. 35 Lónsvík                | 8 events 2002–2011                      |

60

61 **Table S3. West coast of Greenland observations for the new dust sources identified for the first time in this study (No. 53–58 in**  
62 **Fig. 1), based on satellite observations from 2021 and earlier satellite observations for sources identified in East Greenland and**  
63 **Canada (No. 59–64), north of 70°N**

64

| Latitude | Longitude | No. | Description                                                                            | Dust example                                                          | Observed events |
|----------|-----------|-----|----------------------------------------------------------------------------------------|-----------------------------------------------------------------------|-----------------|
| 63.5059  | -51.0454  | 53  | West coast of Greenland, the source appears to be in the delta area, not in the valley | <a href="https://go.nasa.gov/3biQSt9">https://go.nasa.gov/3biQSt9</a> | 26 Oct 2021     |
| 62.2421  | -49.0481  | 54  | West coast of Greenland, the source appears to be a                                    | <a href="https://go.nasa.gov/3Gw80SV">https://go.nasa.gov/3Gw80SV</a> | 23/25 Oct 2021  |

|         |          |    |                                                                                                                                                                          |                                                                       |                      |
|---------|----------|----|--------------------------------------------------------------------------------------------------------------------------------------------------------------------------|-----------------------------------------------------------------------|----------------------|
|         |          |    | small valley with a glacier                                                                                                                                              |                                                                       |                      |
| 63.5163 | -50.9652 | 55 | West coast of Greenland, source appears to be the delta area (Sentinel shows dust plumes up 10 km from the coast, east of delta)                                         | <a href="https://go.nasa.gov/3Ct5cmY">https://go.nasa.gov/3Ct5cmY</a> | 18,19,25,26 Oct 2021 |
| 65.7621 | -51.2866 | 56 | West coast of Greenland, a very narrow valley (not clear if dust comes from the valley or termination tip of glacier). Clear dust plumes when flipping images Aqua/Terra | <a href="https://go.nasa.gov/2ZBLvv2">https://go.nasa.gov/2ZBLvv2</a> | 18 and 22 Oct 2021   |
| 62.4791 | -50.2146 | 57 | West coast of Greenland, small trip of land between sea and glacier                                                                                                      | <a href="https://go.nasa.gov/2ZyWbea">https://go.nasa.gov/2ZyWbea</a> | 18 Oct 2021          |
| 67.359  | -52.3693 | 58 | West coast of Greenland, a short valley, several dust clouds appear                                                                                                      | <a href="https://go.nasa.gov/3vU4qwR">https://go.nasa.gov/3vU4qwR</a> | 18 Oct 2021          |
| 71.8288 | -22.8017 | 59 | East Greenland                                                                                                                                                           | <a href="https://go.nasa.gov/3pOPjng">https://go.nasa.gov/3pOPjng</a> | 3 Oct 2019           |
| 70.4565 | -22.2694 | 60 | East Greenland                                                                                                                                                           | <a href="https://go.nasa.gov/3Gx1paM">https://go.nasa.gov/3Gx1paM</a> | 15 Sep 2020          |
| 78.0407 | -21.4572 | 61 | East Greenland                                                                                                                                                           | <a href="https://go.nasa.gov/3Gw4g3R">https://go.nasa.gov/3Gw4g3R</a> | 24 Sep 2003          |
| 81.3073 | -78.2145 | 62 | Canada                                                                                                                                                                   | <a href="https://go.nasa.gov/3mxJxEZ">https://go.nasa.gov/3mxJxEZ</a> | 2 July 2020          |
| 71.8426 | -22.7902 | 63 | East Greenland, better seen in S2 and L8                                                                                                                                 | <a href="https://go.nasa.gov/3Bt9jy2">https://go.nasa.gov/3Bt9jy2</a> | 30 Sept 2018         |
| 72.3906 | -25.1555 | 64 | East Greenland                                                                                                                                                           | <a href="https://go.nasa.gov/3vXOWb6">https://go.nasa.gov/3vXOWb6</a> | 23 Sep 2003          |

65

66 **Table S4. Locations of the HLD sources (no. 1-64 in Fig. 1) and G-SDS-SBM source intensity (SI) values at location; maximum**  
67 **values found in certain environments given location (areas within the distance from location of 30 arcsec, 0.1°, 0.5°, and 1°); SI is**  
68 **undefined (-99.0) if location mark is not over land; area south of 60°S is not included in G-SDS-SBM, and values at locations in**  
69 **this area are marked with a dash.**

70

| No. | lat     | lon     | at loc. |     | 30 arcsec |     | 0.1° |     | 0.5° |     | 1°  |     |
|-----|---------|---------|---------|-----|-----------|-----|------|-----|------|-----|-----|-----|
|     |         |         | max     | min | max       | min | max  | min | max  | min | max | min |
| 1   | 57.6482 | 10.4059 | 0.8     | 0.0 | 0.9       | 0.0 | 1.0  | 0.0 | 1.0  | 1.0 | 1.0 | 1.0 |
| 2   | 63.2    | 75.5    | 0.1     | 0.0 | 0.1       | 0.0 | 0.1  | 0.0 | 0.3  | 0.2 | 0.5 | 0.2 |

|    |         |              |       |       |       |       |     |     |     |     |     |     |
|----|---------|--------------|-------|-------|-------|-------|-----|-----|-----|-----|-----|-----|
| 3  | 60.1    | 71.4         | 0.0   | 0.0   | 0.0   | 0.0   | 0.3 | 0.0 | 0.3 | 0.0 | 0.8 | 0.3 |
| 4  | 58.9    | 69.2         | 0.0   | 0.0   | 0.0   | 0.0   | 0.2 | 0.0 | 0.7 | 0.3 | 0.8 | 0.3 |
| 5  | 56.5    | 67.5         | 0.1   | 0.0   | 0.2   | 0.0   | 0.2 | 0.0 | 0.3 | 0.1 | 0.5 | 0.1 |
| 6  | 67.6    | 33.4         | 0.0   | 0.0   | 0.0   | 0.0   | 0.8 | 0.0 | 0.9 | 0.0 | 1.0 | 0.0 |
| 7  | 51.3    | 88.5         | 0.0   | 0.0   | 0.0   | 0.0   | 0.2 | 0.0 | 0.4 | 0.0 | 0.4 | 0.2 |
| 8  | 47.3    | 66.7         | 0.5   | 0.0   | 0.5   | 0.0   | 0.6 | 0.3 | 0.7 | 0.4 | 1.0 | 0.7 |
| 9  | -77.9   | 165.2        | -     | -     | -     | -     | -   | -   | -   | -   | -   | -   |
| 10 | 63.5    | -18.2        | 1.0   | 0.0   | 1.0   | 0.0   | 1.0 | 1.0 | 1.0 | 1.0 | 1.0 | 1.0 |
| 11 | 71.4    | 128.5        | 0.0   | 0.0   | 0.3   | 0.0   | 0.4 | 0.0 | 1.0 | 0.0 | 1.0 | 0.0 |
| 12 | 81.7    | -71.1        | 0.7   | 0.0   | 0.8   | 0.0   | 1.0 | 0.0 | 1.0 | 0.0 | 1.0 | 0.0 |
| 13 | 77      | 16           | -99.0 | -99.0 | -99.0 | -99.0 | 0.9 | 0.0 | 1.0 | 0.0 | 1.0 | 0.0 |
| 14 | 60.5    | -144.9       | 0.6   | 0.0   | 0.9   | 0.0   | 1.0 | 0.0 | 1.0 | 0.5 | 1.0 | 0.5 |
| 15 | 56.0054 | 8.1138       | 0.0   | 0.0   | 0.9   | 0.0   | 1.0 | 0.0 | 1.0 | 1.0 | 1.0 | 1.0 |
| 16 | 69.36   | -123.97      | 0.7   | 0.0   | 1.0   | 0.0   | 1.0 | 0.0 | 1.0 | 0.0 | 1.0 | 0.0 |
| 17 | -45.48  | -68.78       | 0.0   | 0.0   | 0.7   | 0.7   | 0.8 | 0.7 | 0.9 | 0.8 | 0.9 | 0.8 |
| 18 | 77      | 15           | -99.0 | -99.0 | -99.0 | -99.0 | 1.0 | 0.0 | 1.0 | 0.0 | 1.0 | 0.0 |
| 19 | -63.9   | -57.9        | -     | -     | -     | -     | -   | -   | -   | -   | -   | -   |
| 20 | -64.2   | -56.6        | -     | -     | -     | -     | -   | -   | -   | -   | -   | -   |
| 21 | 70.4    | -52.5        | 0.5   | 0.0   | 0.6   | 0.0   | 0.8 | 0.0 | 1.0 | 0.0 | 1.0 | 0.0 |
| 22 | 78.7    | 15.7         | 0.3   | 0.0   | 0.3   | 0.0   | 0.7 | 0.0 | 1.0 | 0.0 | 1.0 | 0.0 |
|    |         | -            |       |       |       |       |     |     |     |     |     |     |
| 23 | 63.85   | 22.2163<br>5 | 0.0   | 0.0   | 0.7   | 0.1   | 1.0 | 0.9 | 1.0 | 1.0 | 1.0 | 1.0 |
|    |         | -            |       |       |       |       |     |     |     |     |     |     |
| 24 | 63.87   | 21.1888<br>5 | 0.0   | 0.0   | 1.0   | 0.0   | 1.0 | 0.0 | 1.0 | 1.0 | 1.0 | 1.0 |
|    |         | -            |       |       |       |       |     |     |     |     |     |     |
| 25 | 64.47   | 20.3270<br>2 | 0.4   | 0.0   | 0.4   | 0.0   | 0.6 | 0.2 | 0.8 | 0.5 | 1.0 | 1.0 |
|    |         | -            |       |       |       |       |     |     |     |     |     |     |
| 26 | 63.72   | 20.1401<br>3 | 0.2   | 0.0   | 0.2   | 0.0   | 0.3 | 0.1 | 1.0 | 1.0 | 1.0 | 1.0 |
|    |         | -            |       |       |       |       |     |     |     |     |     |     |
| 27 | 64.14   | 18.2902<br>2 | 0.3   | 0.0   | 0.3   | 0.0   | 0.4 | 0.0 | 0.9 | 0.7 | 1.0 | 1.0 |
|    |         | -            |       |       |       |       |     |     |     |     |     |     |
| 28 | 63.69   | 18.2001<br>2 | 0.0   | 0.0   | 0.4   | 0.0   | 1.0 | 1.0 | 1.0 | 1.0 | 1.0 | 1.0 |
|    |         | -            |       |       |       |       |     |     |     |     |     |     |
| 29 | 64.03   | 17.9927<br>6 | 0.0   | 0.0   | 0.2   | 0.0   | 0.3 | 0.0 | 1.0 | 1.0 | 1.0 | 1.0 |

|           |         |                   |     |     |     |     |     |     |     |     |     |     |
|-----------|---------|-------------------|-----|-----|-----|-----|-----|-----|-----|-----|-----|-----|
| <b>30</b> | 63.7    | -<br>17.7592<br>5 | 0.9 | 0.0 | 0.9 | 0.0 | 1.0 | 0.7 | 1.0 | 1.0 | 1.0 | 1.0 |
| <b>31</b> | 63.91   | -<br>17.5464<br>0 | 0.6 | 0.0 | 0.6 | 0.5 | 1.0 | 0.5 | 1.0 | 1.0 | 1.0 | 1.0 |
| <b>32</b> | 64.84   | -<br>16.8455<br>0 | 0.2 | 0.0 | 0.3 | 0.0 | 0.5 | 0.0 | 0.5 | 0.0 | 1.0 | 1.0 |
| <b>33</b> | 65.02   | -<br>16.4949<br>2 | 0.0 | 0.0 | 0.2 | 0.0 | 0.5 | 0.0 | 0.6 | 0.3 | 1.0 | 1.0 |
| <b>34</b> | 64.24   | -<br>15.2144<br>3 | 0.0 | 0.0 | 0.0 | 0.0 | 1.0 | 0.1 | 1.0 | 1.0 | 1.0 | 1.0 |
| <b>35</b> | 64.38   | -<br>14.7674<br>3 | 0.3 | 0.0 | 0.7 | 0.0 | 1.0 | 1.0 | 1.0 | 1.0 | 1.0 | 1.0 |
| <b>36</b> | -45.56  | -68.7378          | 0.0 | 0.0 | 0.7 | 0.6 | 0.8 | 0.7 | 0.9 | 0.8 | 0.9 | 0.9 |
| <b>37</b> | -53.217 | -68.6934          | 0.0 | 0.0 | 0.3 | 0.2 | 1.0 | 0.9 | 1.0 | 1.0 | 1.0 | 1.0 |
| <b>38</b> | -53.78  | -67.8064          | 0.9 | 0.0 | 1.0 | 0.0 | 1.0 | 0.9 | 1.0 | 1.0 | 1.0 | 1.0 |
| <b>39</b> | -49.53  | -68.1744          | 0.9 | 0.9 | 0.9 | 0.9 | 1.0 | 1.0 | 1.0 | 1.0 | 1.0 | 1.0 |
| <b>40</b> | -47.61  | -65.7979          | 1.0 | 1.0 | 1.0 | 1.0 | 1.0 | 1.0 | 1.0 | 1.0 | 1.0 | 1.0 |
| <b>41</b> | -47.94  | -66.2073          | 0.8 | 0.7 | 0.8 | 0.7 | 1.0 | 1.0 | 1.0 | 1.0 | 1.0 | 1.0 |
| <b>42</b> | -46.72  | -69.0699          | 0.8 | 0.7 | 0.8 | 0.7 | 0.9 | 0.8 | 0.9 | 0.8 | 0.9 | 0.9 |
| <b>43</b> | -46.53  | -69.401           | 0.7 | 0.7 | 0.7 | 0.7 | 0.7 | 0.7 | 0.9 | 0.9 | 0.9 | 0.9 |
| <b>44</b> | -48.54  | -67.015           | 0.8 | 0.8 | 0.8 | 0.8 | 1.0 | 1.0 | 1.0 | 1.0 | 1.0 | 1.0 |
| <b>45</b> | -41.14  | -69.46            | 0.0 | 0.0 | 0.5 | 0.3 | 0.6 | 0.4 | 0.6 | 0.5 | 0.8 | 0.5 |
| <b>46</b> | 70.47   | -52.88            | 0.5 | 0.0 | 0.9 | 0.0 | 0.9 | 0.0 | 1.0 | 0.0 | 1.0 | 0.0 |
| <b>47</b> | 71.36   | -24.53            | 0.6 | 0.0 | 0.6 | 0.0 | 1.0 | 0.0 | 1.0 | 0.0 | 1.0 | 0.0 |
| <b>48</b> | 47.6    | -111.25           | 0.5 | 0.1 | 0.8 | 0.1 | 0.8 | 0.7 | 1.0 | 0.7 | 1.0 | 0.9 |
| <b>49</b> | 67.87   | 44.13             | 1.0 | 0.0 | 1.0 | 0.0 | 1.0 | 0.0 | 1.0 | 0.0 | 1.0 | 0.0 |
| <b>50</b> | 60.9987 | -<br>138.529<br>4 | 0.6 | 0.0 | 0.7 | 0.3 | 0.7 | 0.3 | 0.9 | 0.5 | 1.0 | 0.6 |
| <b>51</b> | 56.4772 | 12.9260           | 0.0 | 0.0 | 0.0 | 0.0 | 0.9 | 0.0 | 1.0 | 0.6 | 1.0 | 0.6 |
| <b>52</b> | 70.7583 | -<br>11.6444      | -   | -   | -   | -   | -   | -   | -   | -   | -   | -   |
| <b>53</b> | 63.5059 | -51.0454          | 0.0 | 0.0 | 0.5 | 0.0 | 1.0 | 0.2 | 1.0 | 1.0 | 1.0 | 1.0 |
| <b>54</b> | 62.2421 | -49.0481          | 0.4 | 0.0 | 0.5 | 0.0 | 0.8 | 0.3 | 1.0 | 1.0 | 1.0 | 1.0 |
| <b>55</b> | 63.5163 | -50.9652          | 0.0 | 0.0 | 0.5 | 0.0 | 1.0 | 0.2 | 1.0 | 1.0 | 1.0 | 1.0 |

|           |         |          |       |       |       |       |     |     |     |     |     |     |
|-----------|---------|----------|-------|-------|-------|-------|-----|-----|-----|-----|-----|-----|
| <b>56</b> | 65.7621 | -51.2866 | 0.0   | 0.0   | 0.6   | 0.0   | 0.9 | 0.0 | 0.9 | 0.0 | 1.0 | 1.0 |
| <b>57</b> | 62.4791 | -50.2146 | 0.5   | 0.0   | 0.6   | 0.0   | 0.6 | 0.3 | 1.0 | 0.9 | 1.0 | 1.0 |
| <b>58</b> | 67.359  | -52.3693 | 0.4   | 0.0   | 0.5   | 0.0   | 1.0 | 0.0 | 1.0 | 0.1 | 1.0 | 1.0 |
| <b>59</b> | 71.8288 | -22.8017 | 0.0   | 0.0   | 1.0   | 0.0   | 1.0 | 0.0 | 1.0 | 0.0 | 1.0 | 0.0 |
| <b>60</b> | 70.4565 | -22.2694 | 0.9   | 0.0   | 1.0   | 0.0   | 1.0 | 0.0 | 1.0 | 0.0 | 1.0 | 0.0 |
| <b>61</b> | 78.0407 | -21.4572 | 1.0   | 0.0   | 1.0   | 0.0   | 1.0 | 0.0 | 1.0 | 0.0 | 1.0 | 0.0 |
| <b>62</b> | 81.3073 | -78.2145 | 0.0   | 0.0   | 0.0   | 0.0   | 0.0 | 0.0 | 0.9 | 0.0 | 1.0 | 0.0 |
| <b>63</b> | 71.8426 | -22.7902 | 0.0   | 0.0   | 0.0   | 0.0   | 1.0 | 0.0 | 1.0 | 0.0 | 1.0 | 0.0 |
| <b>64</b> | 72.3906 | -25.1555 | -99.0 | -99.0 | -99.0 | -99.0 | 0.3 | 0.0 | 0.4 | 0.0 | 1.0 | 0.0 |

71  
72  
73

74  
75  
76  
77

**Table S5. Number of locations for north and south HLD regions that have SI values above a certain threshold (0.9, 0.8, 0.7, 0.6, 0.5, 0.4), depending on the environment size (30 arcsec, 0.1°, 0.5°, and 1°)**

| No. | lat | lon | at loc. |     | 30 arcsec |     | 0.1° |     | 0.5° |     | 1°  |     |
|-----|-----|-----|---------|-----|-----------|-----|------|-----|------|-----|-----|-----|
|     |     |     | max     | min | max       | min | max  | min | max  | min | max | min |

**NORTH HLD REGION (NORTH OF 50°N)**

|          |    |   |    |   |    |   |    |    |    |    |
|----------|----|---|----|---|----|---|----|----|----|----|
| SI ≥ 0.9 | 5  | 0 | 12 | 0 | 27 | 4 | 39 | 16 | 44 | 23 |
| SI ≥ 0.8 | 6  | 0 | 14 | 0 | 31 | 4 | 40 | 16 | 46 | 23 |
| SI ≥ 0.7 | 8  | 0 | 17 | 0 | 33 | 6 | 42 | 18 | 46 | 24 |
| SI ≥ 0.6 | 12 | 0 | 22 | 0 | 36 | 6 | 43 | 19 | 46 | 26 |
| SI ≥ 0.5 | 17 | 0 | 27 | 1 | 38 | 7 | 44 | 22 | 48 | 27 |
| SI ≥ 0.4 | 20 | 0 | 29 | 1 | 40 | 7 | 46 | 23 | 49 | 27 |

**SOUTH HLD REGION (SOUTH OF 40°S)**

|          |   |   |    |   |    |    |    |    |    |    |
|----------|---|---|----|---|----|----|----|----|----|----|
| SI ≥ 0.9 | 3 | 2 | 3  | 2 | 7  | 6  | 10 | 7  | 10 | 9  |
| SI ≥ 0.8 | 6 | 3 | 6  | 3 | 9  | 7  | 10 | 10 | 11 | 10 |
| SI ≥ 0.7 | 7 | 6 | 9  | 7 | 10 | 10 | 10 | 10 | 11 | 10 |
| SI ≥ 0.6 | 7 | 6 | 9  | 8 | 11 | 10 | 11 | 10 | 11 | 10 |
| SI ≥ 0.5 | 7 | 6 | 10 | 8 | 11 | 10 | 11 | 11 | 11 | 11 |
| SI ≥ 0.4 | 7 | 6 | 10 | 8 | 11 | 11 | 11 | 11 | 11 | 11 |

78  
79  
80  
81



**Table S6. Mineralogical and elemental composition of PM2 and PM1000 of soils in Western Siberia.**

| Proxy                              | HLD no.2 (Podzols) |      |              | HLD no.3 (Retisols and Gleysols) |          |             |          | HLD no.4 (Retisols and Gleysols) |          |             |          | HLD no.5 (Phaeozems and Stagnosols) |          |              |          |
|------------------------------------|--------------------|------|--------------|----------------------------------|----------|-------------|----------|----------------------------------|----------|-------------|----------|-------------------------------------|----------|--------------|----------|
|                                    | PM2, n=1           |      | PM1000, n=10 | PM2, n=4                         |          | PM1000, n=7 |          | PM2, n=5                         |          | PM1000, n=5 |          | PM2, n=8                            |          | PM1000, n=11 |          |
|                                    | M                  | M    | $\sigma$     | M                                | $\sigma$ | M           | $\sigma$ | M                                | $\sigma$ | M           | $\sigma$ | M                                   | $\sigma$ | M            | $\sigma$ |
| Smectite, %                        | 36.7               | 0.0  | 0.0          | 51.5                             | 4.1      | 13.7        | 10.4     | 46.8                             | 5.5      | 17.7        | 10.5     | 47.6                                | 11.6     | 23.2         | 8.7      |
| Illite, %                          | 5.5                | 2.9  | 1.0          | 8.7                              | 1.4      | 9.3         | 0.8      | 8.1                              | 0.9      | 6.3         | 0.7      | 8.3                                 | 2.2      | 10.1         | 1.5      |
| I/Sm, %                            | 23.6               | <0.1 | -            | 18.2                             | 1.0      | <0.1        | -        | 20.1                             | 5.1      | <0.1        | -        | 26.0                                | 10.1     | <0.1         | -        |
| Kaolinite, %                       | 6.7                | 1.4  | 1.2          | 3.5                              | 0.8      | 2.3         | 0.6      | 6.5                              | 2.5      | 2.2         | 1.1      | 5.3                                 | 1.7      | 3.4          | 0.7      |
| Chlorite, %                        | 2.1                | 0.4  | 0.5          | 2.4                              | 0.8      | 1.0         | 0.7      | 1.1                              | 1.1      | 2.1         | 0.8      | 1.9                                 | 0.5      | 1.7          | 0.7      |
| Pls, %                             | 6.4                | 5.5  | 2.7          | 4.3                              | 0.8      | 15.5        | 3.2      | 4.5                              | 0.7      | 14.6        | 3.4      | 3.5                                 | 1.3      | 13.8         | 2.5      |
| PFS, %                             | 7.1                | 4.9  | 3.0          | 4.9                              | 1.3      | 8.3         | 1.9      | 4.3                              | 0.9      | 8.3         | 1.4      | 5.4                                 | 1.8      | 8.1          | 1.6      |
| Quartz, %                          | 11.2               | 84.6 | 6.8          | 5.7                              | 1.7      | 49.8        | 10.2     | 7.6                              | 4.5      | 48.7        | 8.9      | 4.1                                 | 2.6      | 38.4         | 6.2      |
| Calcite, %                         | 0.8                | 0.4  | 0.2          | 1.1                              | 0.2      | 0.0         | 0.0      | 1.0                              | 0.7      | 0.0         | 0.0      | 2.0                                 | 2.6      | 1.4          | 3.1      |
| TOC, %                             | n.a.               | 1.7  | 3.7          | 1.0                              | 1.0      | 4.7         | 7.3      | 6.0                              | 4.3      | 1.8         | 2.9      | 2.4                                 | 3.1      | 1.0          | 1.4      |
| Na <sub>2</sub> O, %               | 0.71               | 0.54 | 0.32         | 0.25                             | 0.14     | 0.99        | 0.33     | 0.19                             | 0.09     | 1.23        | 0.26     | 0.18                                | 0.05     | 0.87         | 0.24     |
| MgO, %                             | 1.14               | 0.13 | 0.11         | 1.97                             | 0.22     | 1.18        | 0.67     | 1.73                             | 0.37     | 1.28        | 0.29     | 2.33                                | 0.29     | 1.75         | 0.43     |
| Al <sub>2</sub> O <sub>3</sub> , % | 20.7               | 3.5  | 2.0          | 15.6                             | 3.1      | 10.9        | 2.8      | 16.2                             | 2.7      | 10.9        | 1.3      | 17.2                                | 3.3      | 12.0         | 1.9      |
| P <sub>2</sub> O <sub>5</sub> , %  | 0.34               | 0.47 | 0.47         | 0.34                             | 0.47     | 0.13        | 0.07     | 0.44                             | 0.26     | 0.16        | 0.15     | 0.25                                | 0.21     | 0.27         | 0.41     |
| S, %                               | 0.24               | 0.04 | 0.02         | 0.14                             | 0.25     | 0.09        | 0.04     | 0.12                             | 0.15     | <0.1        | -        | 0.06                                | 0.07     | 0.06         | 0.02     |
| K <sub>2</sub> O, %                | 1.64               | 1.18 | 0.54         | 1.86                             | 0.32     | 1.74        | 0.29     | 1.59                             | 0.17     | 1.88        | 0.16     | 2.50                                | 0.42     | 2.14         | 0.26     |
| CaO, %                             | 0.48               | 0.16 | 0.07         | 1.20                             | 0.34     | 0.75        | 0.36     | 1.05                             | 0.47     | 1.18        | 0.36     | 2.32                                | 1.77     | 1.97         | 2.00     |

|                                    |      |      |      |      |      |      |      |      |      |      |      |      |      |      |      |
|------------------------------------|------|------|------|------|------|------|------|------|------|------|------|------|------|------|------|
| TiO <sub>2</sub> , %               | 0.92 | 0.33 | 0.19 | 0.71 | 0.14 | 1.03 | 0.04 | 0.61 | 0.14 | 1.00 | 0.21 | 0.62 | 0.11 | 0.97 | 0.08 |
| MnO, %                             | 0.29 | 0.02 | 0.01 | 0.10 | 0.06 | 0.06 | 0.04 | 0.13 | 0.08 | 0.10 | 0.09 | 0.07 | 0.04 | 0.12 | 0.08 |
| Fe <sub>2</sub> O <sub>3</sub> , % | 9.1  | 0.5  | 0.4  | 8.8  | 2.2  | 3.6  | 2.0  | 9.2  | 2.8  | 4.9  | 1.2  | 8.8  | 1.1  | 5.3  | 1.5  |
| V, mg/kg                           | 171  | 30   | 17   | 174  | 45   | 123  | 24   | 164  | 35   | 115  | 14   | 168  | 24   | 140  | 16   |
| Cr, mg/kg                          | 754  | 36   | 26   | 298  | 251  | 129  | 20   | 231  | 67   | 144  | 16   | 216  | 96   | 154  | 28   |
| Co, mg/kg                          | 62   | <10  | -    | 22   | 4.4  | 15.3 | 3.5  | 26.2 | 6.4  | 20   | 7.5  | 17   | 2.1  | 17   | 3.8  |
| Ni, mg/kg                          | 182  | <10  | -    | 115  | 45   | 29   | 15   | 85   | 8.0  | 32   | 9.4  | 90   | 25   | 47   | 11   |
| Cu, mg/kg                          | 59   | <10  | -    | 54   | 5.0  | 20   | 5.3  | 38   | 10   | 15   | 1.5  | 48   | 9.9  | 28   | 4.5  |
| Zn, mg/kg                          | 180  | 26   | 8.1  | 144  | 21   | 50   | 22   | 136  | 25   | 61   | 17   | 126  | 9.7  | 75   | 12   |
| As, mg/kg                          | 15   | <10  | -    | 13   | 2,4  | <10  | -    | 14   | 4.5  | <10  | -    | 12   | 3.2  | <10  | -    |
| Pb, mg/kg                          | 36   | <10  | -    | 32   | 21   | 19   | 5.3  | 28   | 7.1  | 23.3 | 12   | 19   | 3.3  | 27   | 5.1  |

84 I/Sm – illite-smectite mixed-layer minerals with predomination of illite interlayers, PLs – Plagioclases PFS – potassium  
85 feldspars, TOC – total organic carbon

86

87 **Table S7. Some characteristics of tailing ponds on the Kola Peninsula (Masloboev et al., 2016).**

| No. | Object                                                                           | Exploitation period   | Total area, ha | Resource, mln. t |
|-----|----------------------------------------------------------------------------------|-----------------------|----------------|------------------|
| 1   | Tailing pond of processing plant no. 1 of the Pechenganickel works, JSC Kola MMC | 1945–1994             | 1033           | ~220             |
| 2   | Tailing pond of processing plant no. 2 of the Pechenganickel works, JSC Kola MMC | 1965–<br>present time |                | 22.4             |
| 3   | Tailing pond of processing plant of the Severonikel works, JSC Kola MMC          | 1935–1978             | No data        | 5.3              |
| 4   | Dumps of granulated slag of the Pechenganickel works, JSC Kola MMC               | 1945–<br>present time | 80             | 47               |
| 5   | Tailing pond no. 1 and no. 2 of crushing and processing plant, JSC Olkon         | 1954–<br>present time | 1400           | ~300             |
| 6   | Tailing pond of apatite-nepheline processing plant no.1 (ANOF-1), JSC Apatit     | 1957–1963             | 120            | 24.4             |
| 7   | Tailing pond of apatite-nepheline processing plant no. 2 (ANOF-2), JSC Apatit    | 1963–<br>present time | 1652           | ~550             |
| 8   | Tailing pond of apatite-nepheline processing plant no. 3 (ANOF-3), JSC Apatit    | 1988–<br>present time | 1158           | ~250             |
| 9   | Tailing pond of JSC Kovdorskiy GOK, (field no. 1)                                | 1962–1980             | 330            | 53.8             |
| 10  | Tailing pond of JSC Kovdorskiy GOK, (field no. 2)                                | 1988–<br>present time | 900            | 80               |
| 11  | Tailing pond of LLC Lovoserskiy GOK                                              | 1951–<br>present time | No data        | 12               |
| 12  | Tailing pond of LLC Kovdorslyuda                                                 | 1959 –<br>present     | 35             | 6                |

89 **Supplement: Central part of the East European Plain: partitioning of chemical elements among five particle-sized**  
90 **fractions**

91

92 Topsoil (0–10 cm) samples were collected along several transects (Samonova and Aseyeva, 2020), crossing two small  
93 erosional landforms—a gully and a balka (Fig 1A). The collected bulk samples (n=22) were physically fractionated into five  
94 particle-sized fractions (250–1000, 50–250, 10–50, 1–10, and <1  $\mu\text{m}$ , n=100). The boundaries among particle size classes were  
95 defined according to the Russian conventional fraction groups: coarse and medium sand (250–1000  $\mu\text{m}$ ), fine sand (50–250  
96  $\mu\text{m}$ ), coarse silt (10–50  $\mu\text{m}$ ), medium and fine silt (1–10  $\mu\text{m}$ ), and clay (<1  $\mu\text{m}$ ). The concentrations of Al, Fe, Mn, Ti, Li, Be,  
97 Sc, V, Cr, Co, Ni, Cu, Zn, Ga, As, Rb, Mo, Cd, Sn, Sb, Cs, Pb, Ta, Tl, Bi, Th, Y, Nb, Ba, U, Zr, Sr, and Hf were determined  
98 on Elan-6100 and Optima-4300 DV spectrometers (Perkin Elmer Inc., USA) by ICP-AES/MS after the samples were digested  
99 in a mixture of acids (NSAM-499-AES/MS method). In physical fractionation, the sand fractions were separated from the bulk  
100 soil samples by wet sieving, while the silt and clay fractions were obtained by sedimentation and siphoning during times  
101 determined by Stokes' law.

102 The measured concentrations and element distribution among soil particle-sized fractions are shown in Figs. 2A, 3A, and 4A.  
103 Because of the different ways in which the elements can occur in the soils (Samonova and Aseyeva, 2020), their distribution  
104 among particle-sized fractions varies. However, some common patterns in partitioning the elements exist, which allowed us  
105 to combine them into several distinct groups (groups A, B, and C). According to our results, most of the elements (Al, Cd, Zn,  
106 Sc, V, Tl, Pb, Rb, Ti, Nb, Th, Y, U, Li, Cs, Be, and Ga) showed the progressive accumulation from the coarser to the finer  
107 fractions and a maximum of the element concentration in the clay fraction (Fig.2A). The predominant accumulation of metals  
108 in the fine fractions was reported earlier for the natural and polluted soils (Hardy and Cornu, 2006; Ljung et al., 2006),  
109 suggesting these elements are mainly found in the secondary minerals such as phyllosilicate clays, where they occur as  
110 structural components or adsorbed ions. A more detailed study of the element partitioning showed that group A was not  
111 homogeneous because of some differences in the distribution of the elements between the two sand fractions, which allowed  
112 us to identify several subgroups of the elements. The first subgroup (Al, Cd, Zn, Sc, V, Tl, Pb, and Rb) included the elements  
113 partitioned equally between the two sand fractions. The second contained Ti, Nb, Th, Y, and U, with higher affinity to the finer  
114 sand fraction, presumably due to the preferential accumulation of stable minerals like rutile and titanite in the fine sand and  
115 silt fractions. The third included the lithophile elements (Li, Cs, Be, Ga) associated more closely with the coarser sand fraction  
116 than the fine sand fraction.

117 Unlike group A, the elements from group B had minimal concentrations, not in the sand but the silt fractions, specifically the  
118 coarse silt fraction (Cr, Ni, Sn, Bi, Sb, As, Mn, and Co) or both silt fractions (Fe and Mo). However, the major element hosting  
119 a particle-sized fraction remained the same (the clay fraction). Most of the elements comprising this group participate in redox  
120 reactions and belong to the arsenic group or represent typical elements of the ferro-family. The latter group can occur in soils  
121 as structural components of primary ferrous minerals or/and as co-precipitates in secondary Fe-Mn (hydr)oxides. Most of the  
122 elements from group B did not concentrate in the sand fractions, except for Mn, Co, and Mo, which, in some cases, displayed

123 two concentration maxima (one in clay and one in sand). Such bimodal distribution was reported earlier and can be explained  
 124 by the presence of several hosting minerals and phases having high retention for these metals. In the clay, Mn and Co are  
 125 associated with secondary clay minerals. However, in the sand, they seem bound to newly formed Mn (hydr)oxides.  
 126 The last group (group C) incorporated stable elements Zr and Hf. Their maximum concentrations were observed in the silt  
 127 fractions, with a maximum in the coarse silt and a minimum in the coarse and medium sand fractions. Such distribution among  
 128 different particle-sized fractions can be explained by the occurrence of these elements in detrital grains of primary accessory  
 129 minerals, such as zircon, usually concentrated in the fine sand to coarse silt fractions.  
 130 In conclusion, our geochemical study conducted in the central part of European Russia showed that most of the elements in  
 131 the upper horizons of typical silty soils displayed progressive accumulation in the finer fractions. However, our data also  
 132 proves that the preferential association of the elements with particle-sized fractions is not limited to the clay fraction. Metals  
 133 such as Mn and Co tend to have bimodal distribution with concentration maxima in the clay and sand fractions. The partitioning  
 134 of Zr, Hf, Nb, Ti, U, and Y accumulating in the silt fractions is governed by their presence in the mineral structure of accessory  
 135 minerals that are stable during transport, physicochemical weathering, and soil formation. In many cases, the coarse silt  
 136 fraction, with particle sizes of 10–50  $\mu\text{m}$ , is depleted in elements, which can stem from its loessial origin.  
 137  
 138

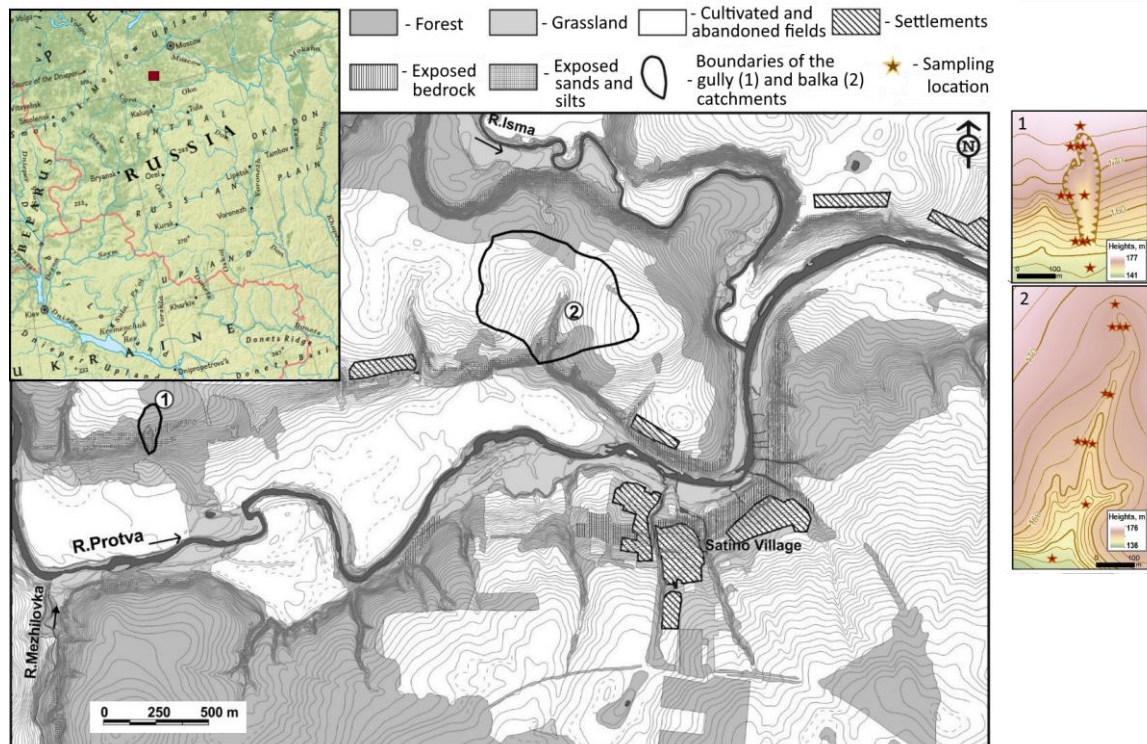

139

140 **Figure S1. Map of the study area in Central European Russia with the study objects and sampling locations (Samonova and Aseyeva,**  
141 **2020).**  
142  
143

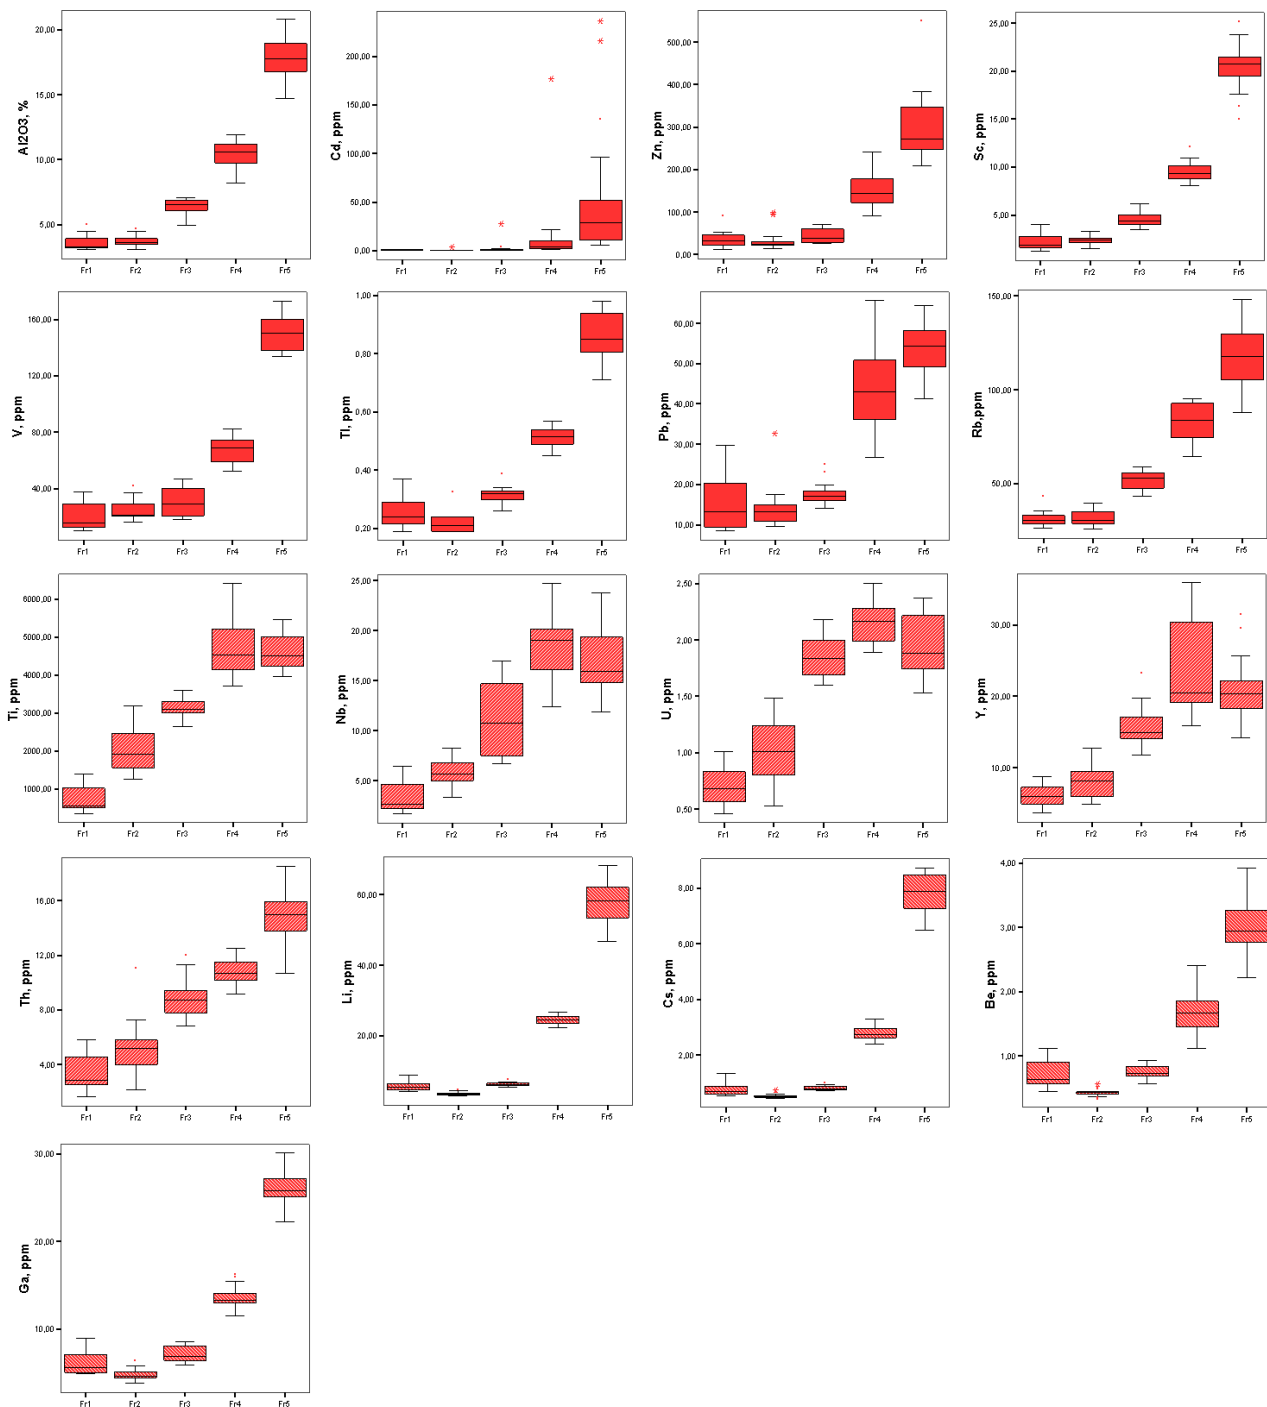

144

145 **Figure S2. The abundances of elements (group A) in the soil particle size fractions.** Median is indicated as a line across the box. X-axis:  
 146 particle size fractions Fr1 – coarse and medium sand (250–1000 μm); Fr2 – fine sand (50–250 μm); Fr3 – coarse silt (10–50 μm); Fr4 –  
 147 medium and fine silt (1–10 μm); Fr5 – clay (<1 μm).

148

149

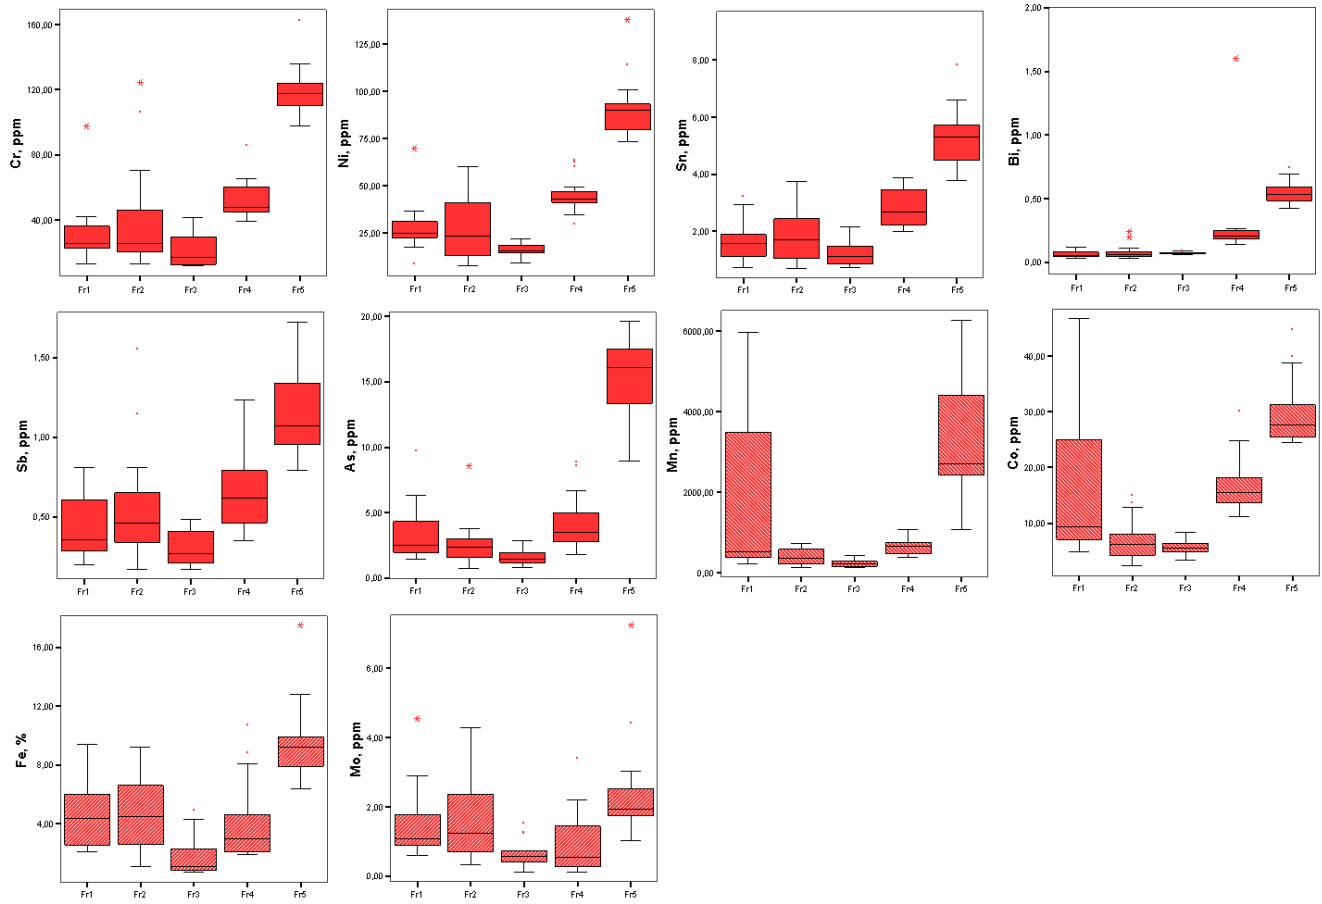

150

151

152 **Figure S3. The abundances of elements (group B) in the soil particle size fractions.** Median is indicated as a line across the box. X-axis:  
153 particle size fractions Fr1 – coarse and medium sand (250–1000  $\mu\text{m}$ ); Fr2 – fine sand (50–250  $\mu\text{m}$ ); Fr3 – coarse silt (10–50  $\mu\text{m}$ ); Fr4 –  
154 medium and fine silt (1–10  $\mu\text{m}$ ); Fr5 – clay (<1  $\mu\text{m}$ ).

155

156



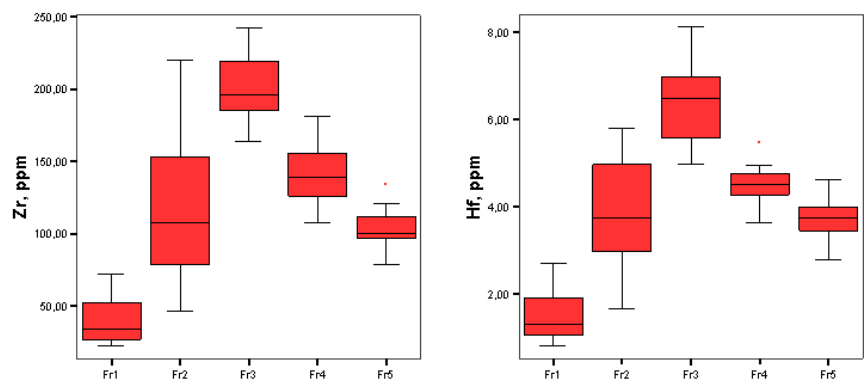

157

158

159

**Figure S4. The abundances of elements (group C) in the soil particle size fractions.** Median is indicated as a line across the box. X-axis: particle size fractions Fr1 – coarse and medium sand (250–1000  $\mu\text{m}$ ); Fr2 – fine sand (50–250  $\mu\text{m}$ ); Fr3 – coarse silt (10–50  $\mu\text{m}$ ); Fr4 – medium and fine silt (1–10  $\mu\text{m}$ ); Fr5 – clay (<1  $\mu\text{m}$ ).

162

163
